# Supplementary material for: Melt pond fractions on Arctic summer sea ice retrieved from Sentinel-3 satellite data with a constrained physical forward model
Source: Copernicus journal article supplement (doi:10.5194/egusphere-2023-2194), 2023-10-05
Supplement: Supplementary file [file egusphere-2023-2194-AC1-supplement.pdf]

# Melt pond fractions on Arctic summer sea ice retrieved from Sentinel-3 satellite data with a constrained physical forward model

## Response to reviewer 1

We thank the reviewer very much for the time and effort to thoroughly read and evaluate our manuscript to improve its quality.

Overall: Melt ponds play a critical role in assessing the reflectance of sea ice and thus the surface energy balance. Determination of areal melt pond coverage is challenging, due to the variability in individual pond reflectance, and to the flat spectral reflectance of snow-covered ice and open ocean. The MDP2 technique presented in this paper utilizes physical parameterizations to determine individual pond reflectance rather than a single fixed reflectance curve, as well as 4 surface types to more accurately estimate pond coverage from a high-resolution satellite-based sensor (Sentinel-2). The results presented show promise to improve pond coverage parameterizations in sea ice models, as well as regional studies of the evolution of the sea ice surface.

The MDP2 technique is sound and presented clearly. The paper is well-written and the figures are important to explain intermediate and final results.

I recommend accepting this paper after addressing a couple comments and the corrections that follow:

Thank you very much for your positive and encouraging feedback. In the following we will address every comment separately.

Specific comments:

Line #    Comment

95    Should provide a citation for OSI-SAF drift data, and mention its tracking error

We will add a reference to the download source of the OSI-SAF drift product. Also the product comes along with an uncertainty estimate of the drift for every single data point. We will add this comment as well as a rough estimate of the average uncertainty to the data description section.

124    should read “from 2012 to 2022”

Thanks, we correct the order of the years.

166    The assumption of clear melt water may lead to occasional error in actual pond reflectance, with dust and other aerosols present in or near the bottom of the pond. This is particularly true near coastal areas but have been shown to be transported from regions with high industrial activity. This would be difficult to address in this pond estimation technique but should be mentioned as a possible impact on pond reflectance.

The used model of melt pond reflectance was carefully verified with field measurements in (Malinka et al; 2018). Most of the melt ponds observed on Arctic sea ice in three different expeditions were quite clear and showed very good coincidence of the measured and modeled spectra. Some melt ponds were polluted and showed a decrease in spectral albedo in the blue region by a maximum value of 0.03 with an rmsd = 0.1. However, the ponds of these kind were rather dark and had an albedo below 0.3 in the blue range. As it is the reduction of albedo that determines the actual retrieved pond fraction, the presence of a sediment will result in an overestimation of the melt pond fraction by  $(1-0.3)/(1-0.3-0.03)$ , i.e. 4% as an upper bound, and  $(1-0.3)/(1-0.3-0.01)$ , i.e. 1.4% as an rmsd assessment.

We will mention in the manuscript that close to the coast this might not necessarily 100% correct but will not effect the retrieval outcome significantly:

“Although this might not be perfectly true, especially in near coastal areas, the effect on the retrieval results in the form of an overestimation of melt pond fraction is estimated to be negligibly small (Malinka et al. 2018).”

230 Should read “This additional information...”

We correct that.

286 Should read “no longer considered...”

We correct that.

297 Should read “are NOT appropriate...”

We correct that.

372 Should read “both differences...”

Thanks for spotting.

456 End of sentence continues after Fig 14 – hard to find

We will take care of this during the final editing process if this is still a problem then.

525 Does Webster or others have MOSAiC aerial melt pond coverage, that can be directly compared to the derived pond fraction from MPD2?

Airborne melt pond fraction observations usually only cover small parts of the Sentinel-3 footprints. Because of the spatial variability of melt pond fraction this would lead to inaccurate comparisons which are hard to interpret. That is the reason why we decided to use the hierarchy airborne – Sentinel-2 – Sentinel-3 to compare and evaluate our product. In our preceding paper (Niehaus et al. 2023, <https://doi.org/10.1029/2022GL102102>) we have compared the Sentinel-2 melt pond fraction to airborne data.

559 need brackets about citations

We correct that.
